# Supplementary material
Source: PubMed Central journal article supplement (PMC4774264)

**Supplemental Table 1. Excel sheet summarizes SCA at 15,658 SNPs.**

**Supplemental Table 2. The set of  $\tau$  estimates for wet and dry tissue as a function of read depth at a**

**SNP.**

| read<br>depth | tau-wet | tau-dry |
|---------------|---------|---------|
| 1             | 0.0000  | 0.000   |
| 2             | 0.0426  | 0.028   |
| 3             | 0.1837  | 0.141   |
| 4             | 0.2043  | 0.149   |
| 5             | 0.3384  | 0.246   |
| 6             | 0.3498  | 0.251   |
| 7             | 0.4632  | 0.326   |
| 8             | 0.4728  | 0.336   |
| 9             | 0.5691  | 0.405   |
| 10            | 0.5748  | 0.405   |
| 11            | 0.6415  | 0.466   |
| 12            | 0.6524  | 0.463   |
| 13            | 0.6969  | 0.520   |
| 14            | 0.6807  | 0.492   |
| 15            | 0.6993  | 0.516   |
| 16            | 0.7157  | 0.536   |
| 17            | 0.7581  | 0.560   |
| 18            | 0.7607  | 0.572   |
| 19            | 0.7852  | 0.597   |
| 20            | 0.7126  | 0.543   |
| 21            | 0.7653  | 0.589   |
| 22            | 0.7653  | 0.589   |
| 23            | 0.7653  | 0.589   |
| 24            | 0.7653  | 0.589   |
| 25            | 0.8179  | 0.634   |
| 26            | 0.8179  | 0.634   |
| 27            | 0.8179  | 0.634   |
| 28            | 0.8179  | 0.634   |
| 29            | 0.8399  | 0.687   |
| 30            | 0.8399  | 0.687   |
| 31            | 0.8399  | 0.687   |
| 32            | 0.8399  | 0.687   |
| 33            | 0.8399  | 0.687   |
| 34            | 0.8864  | 0.710   |

|    |        |       |
|----|--------|-------|
| 35 | 0.8864 | 0.710 |
| 36 | 0.8864 | 0.710 |
| 37 | 0.8864 | 0.710 |
| 38 | 0.8887 | 0.737 |
| 39 | 0.8887 | 0.737 |
| 40 | 0.8887 | 0.737 |
| 41 | 0.8887 | 0.737 |
| 42 | 0.8952 | 0.724 |
| 43 | 0.8952 | 0.724 |
| 44 | 0.8952 | 0.724 |
| 45 | 0.8952 | 0.724 |
| 46 | 0.9083 | 0.766 |
| 47 | 0.9083 | 0.766 |
| 48 | 0.9083 | 0.766 |
| 49 | 0.9083 | 0.766 |
| 50 | 0.9380 | 0.815 |
| 51 | 0.9380 | 0.815 |
| 52 | 0.9380 | 0.815 |
| 53 | 0.9380 | 0.815 |
| 54 | 0.9380 | 0.815 |
| 55 | 0.9396 | 0.833 |
| 56 | 0.9396 | 0.833 |
| 57 | 0.9396 | 0.833 |
| 58 | 0.9396 | 0.833 |
| 59 | 0.9503 | 0.852 |
| 60 | 0.9503 | 0.852 |
| 61 | 0.9503 | 0.852 |
| 62 | 0.9503 | 0.852 |
| 63 | 0.9525 | 0.875 |
| 64 | 0.9525 | 0.875 |
| 65 | 0.9525 | 0.875 |
| 66 | 0.9525 | 0.875 |
| 67 | 0.9696 | 0.887 |
| 68 | 0.9696 | 0.887 |
| 69 | 0.9696 | 0.887 |
| 70 | 0.9696 | 0.887 |
| 71 | 0.9806 | 0.887 |
| 72 | 0.9806 | 0.887 |
| 73 | 0.9806 | 0.887 |
| 74 | 0.9806 | 0.887 |
| 75 | 0.9806 | 0.887 |
| 76 | 0.9975 | 0.906 |
| 77 | 0.9975 | 0.906 |

|      |        |        |
|------|--------|--------|
| 78   | 0.9975 | 0.906  |
| 79   | 0.9975 | 0.906  |
| 80   | 0.9973 | 0.900  |
| 81   | 0.9973 | 0.900  |
| 82   | 0.9973 | 0.900  |
| 83   | 0.9973 | 0.900  |
| 84   | 1.0000 | 0.914  |
| 85   | 1.0000 | 0.914  |
| 86   | 1.0000 | 0.914  |
| 87   | 1.0000 | 0.914  |
| 88   | 1.0000 | 0.937  |
| 89   | 1.0000 | 0.937  |
| 90   | 1.0000 | 0.937  |
| 91   | 1.0000 | 0.937  |
| 92   | 1.0000 | 0.937  |
| 93   | 1.0000 | 0.937  |
| 94   | 1.0000 | 0.937  |
| 95   | 1.0000 | 0.937  |
| 96   | 1.0000 | 0.937  |
| 97   | 1.0000 | 0.937  |
| 98   | 1.0000 | 0.937  |
| 99   | 1.0000 | 0.937  |
| 100+ | 1.0000 | 1.0000 |

**Supplemental Table 3. Replicate STRUCTURE runs for K ranging from 1-4 with 10 replicates per K.**

| K | rep | LN prob of data |
|---|-----|-----------------|
| 1 | 0   | -314443         |
| 1 | 1   | -314458         |
| 1 | 2   | -314463         |
| 1 | 3   | -314459         |
| 1 | 4   | -314446         |
| 1 | 5   | -314446         |
| 1 | 6   | -314458         |
| 1 | 7   | -314435         |
| 1 | 8   | -314449         |
| 1 | 9   | -314469         |
| 2 | 0   | -294549         |
| 2 | 1   | -294706         |
| 2 | 2   | -294601         |
| 2 | 3   | -294615         |

|   |   |         |
|---|---|---------|
| 2 | 4 | -294673 |
| 2 | 5 | -294583 |
| 2 | 6 | -294848 |
| 2 | 7 | -294621 |
| 2 | 8 | -294693 |
| 2 | 9 | -294672 |
| 3 | 0 | -295226 |
| 3 | 1 | -294864 |
| 3 | 2 | -296034 |
| 3 | 3 | -294695 |
| 3 | 4 | -295223 |
| 3 | 5 | -294754 |
| 3 | 6 | -342774 |
| 3 | 7 | -294937 |
| 3 | 8 | -294898 |
| 3 | 9 | -294823 |

|   |   |         |
|---|---|---------|
| 4 | 0 | -294929 |
| 4 | 1 | -368494 |
| 4 | 2 | -295312 |
| 4 | 3 | -423949 |
| 4 | 4 | -296421 |
| 4 | 5 | -297542 |
| 4 | 6 | -294892 |
| 4 | 7 | -355275 |
| 4 | 8 | -319750 |
| 4 | 9 | -343484 |

**Supplemental Table 4. Mean Fst values for SNPs categorized by significance for viability selection (top) and qM/qS.**

|                               |     | Mean Fst | n     | SE    |
|-------------------------------|-----|----------|-------|-------|
| Significance based on delta32 |     |          |       |       |
| fst(BR vs Quarry)             | ns  | 0.123    | 13911 | 0.001 |
|                               | sig | 0.156    | 343   | 0.009 |
| fst(IM vs Quarry)             | ns  | 0.131    | 13978 | 0.001 |
|                               | sig | 0.170    | 344   | 0.010 |
| fst(BR v IM)                  | ns  | 0.065    | 10508 | 0.001 |
|                               | sig | 0.062    | 261   | 0.007 |
| Significance based on delta31 |     |          |       |       |
| fst(BR vs Quarry)             | ns  | 0.120    | 12622 | 0.001 |
|                               | sig | 0.152    | 1632  | 0.004 |
| fst(IM vs Quarry)             | ns  | 0.127    | 12688 | 0.001 |
|                               | sig | 0.169    | 1634  | 0.005 |
| fst(BR v IM)                  | ns  | 0.065    | 9527  | 0.001 |
|                               | sig | 0.061    | 1242  | 0.003 |

**Supplemental Table 5.** We considered genotypes in isolation from any information about parents or progeny and calculated a confidence score (CS) as the difference between the likelihood of the most likely genotype (RR, RA, and AA) and the second most likely. GATK standardizes the likelihoods such that the highest has value 1. As a consequence, the maximum CS is 1 (which happens when we are certain of the genotype; likelihood of other two genotypes is zero). Across SNPs, the mean CS is very similar for S (0.731) parents and D parents (0.723).

**If we parse all SNPs according significance for the viability selection test:**

|                     |     |           |                      |
|---------------------|-----|-----------|----------------------|
| Offspring genotypes | ns  | N = 15291 | Mean CS score = 0.70 |
|                     | sig | 367       | 0.74                 |
| Parent genotypes    | ns  | 15291     | 0.73                 |
|                     | sig | 367       | 0.74                 |

**If we parse all SNPs according significance for the fecundity selection test:**

|                     |     |           |                      |
|---------------------|-----|-----------|----------------------|
| Offspring genotypes | ns  | N = 13925 | Mean CS score = 0.69 |
|                     | sig | 1733      | 0.74                 |
| Parent genotypes    | ns  | 13925     | 0.72                 |
|                     | sig | 1733      | 0.74                 |

**Supplemental Table 6.** Excel sheet summarizes SCA at 15,658 SNPs when analysis was redone assuming external survey had 600 of 1000 plants survive.

**Supplemental Table 7.** Excel sheet summarizes SCA at 15,658 SNPs when analysis was redone assuming external survey had 800 of 1000 plants survive.



Supplemental Figures:

**Supplemental Figure 1.** The y-axis is the sum of posterior probabilities of heterozygotes (across individual and SNPs) divided by the number of calls (across individual and SNPs) at a given read depth.

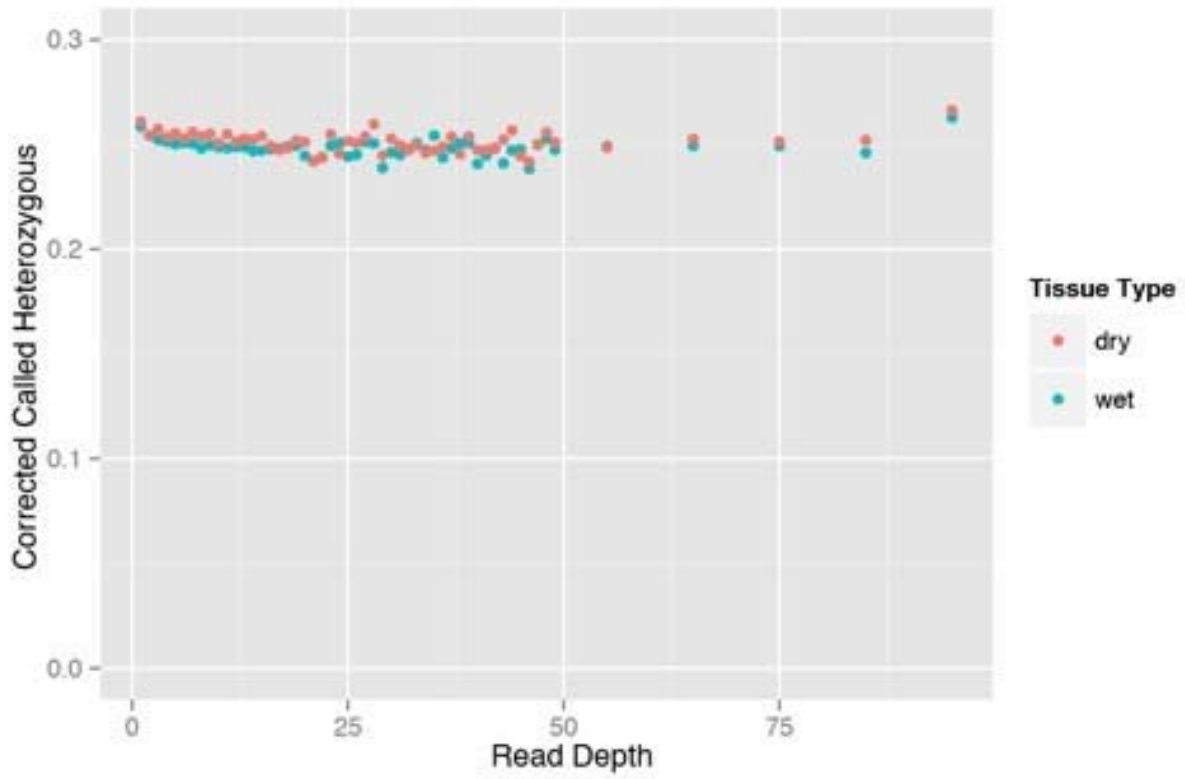

**Supplemental Figure 2. The relationship between two measures of inter-sibling distance**

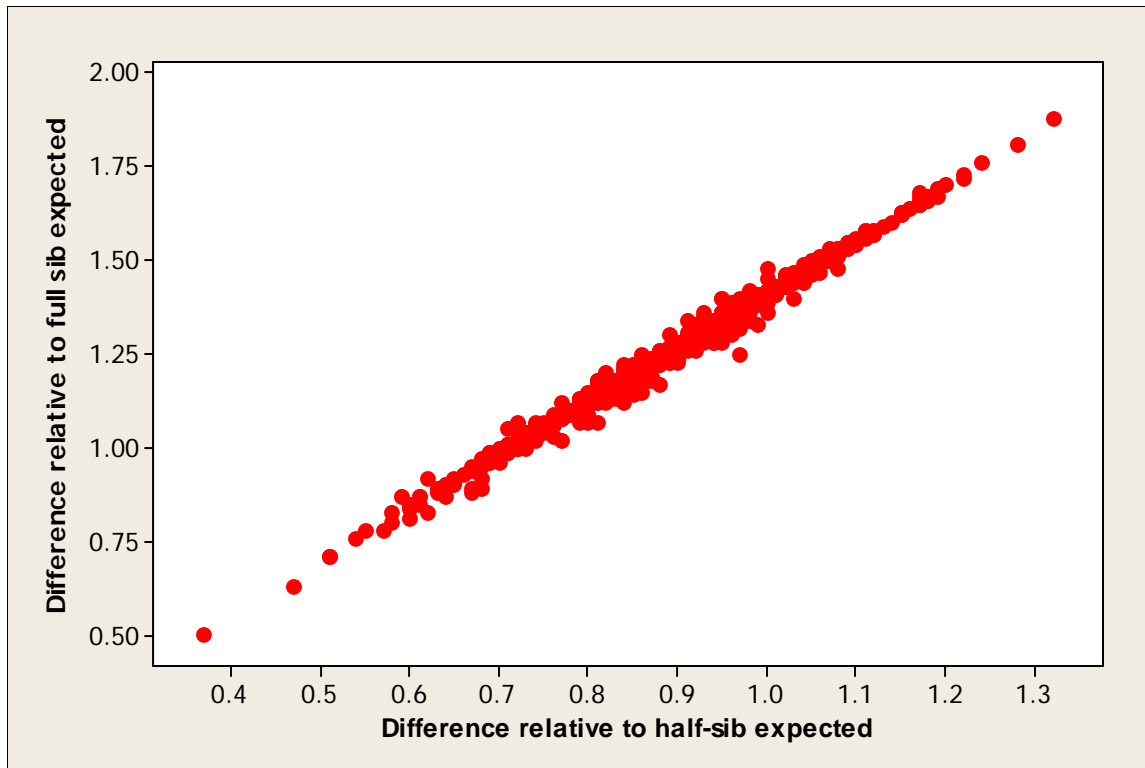

**Supplemental Figure 3. The distributions of sMLH in parents and offspring (all plants with at least 1000 genotype calls).**

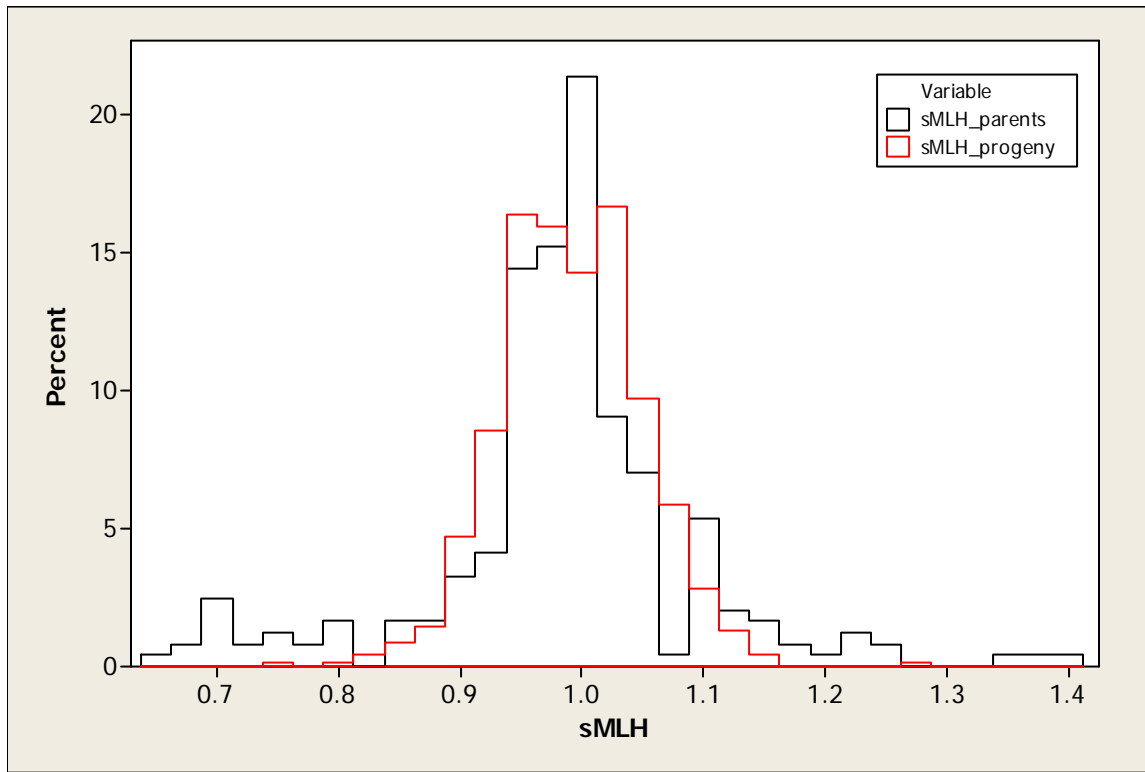

**Supplemental Figure 4. Density plots for three contrasts of pairwise genetic distance between parental plants: D versus D (red), D versus S (orange), and S versus S (green). Contrasts were limited to plant pairs with at least 500 common SNPs.**

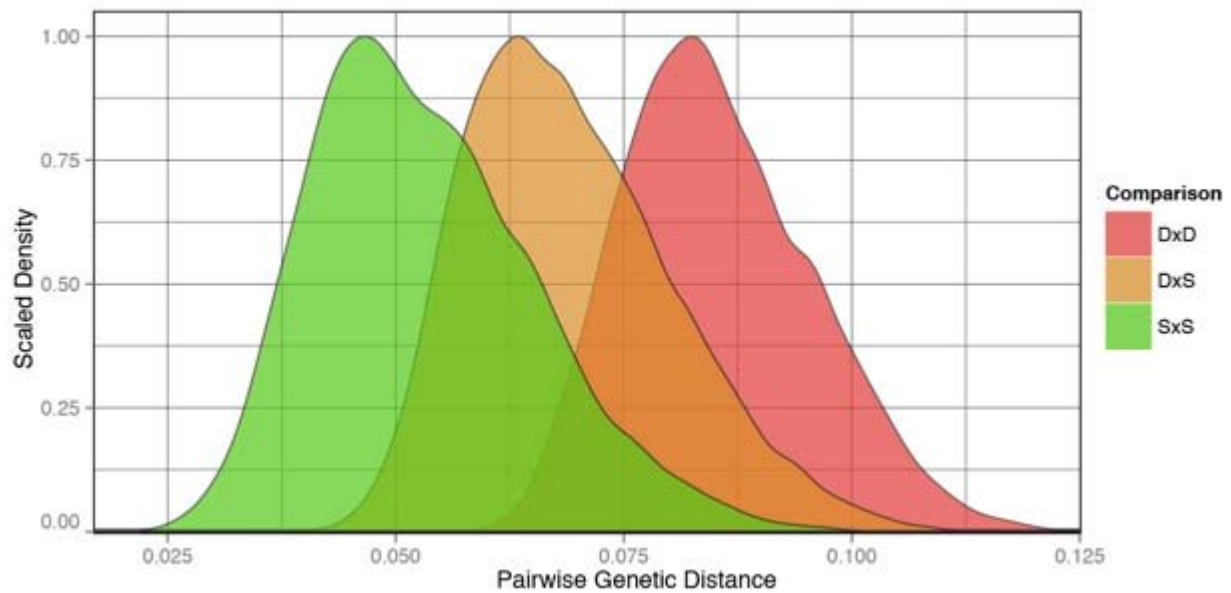

Supplemental Figure 5. The predicted difference in allele frequency between successful male gametes and all surviving adults ( $\Delta q_{MS} = q_M - q_S$ ) as a function of initial frequency for significant (red) and non-significant (black) SNPs. Here, significance is according to the  $q_M / q_S$  test.

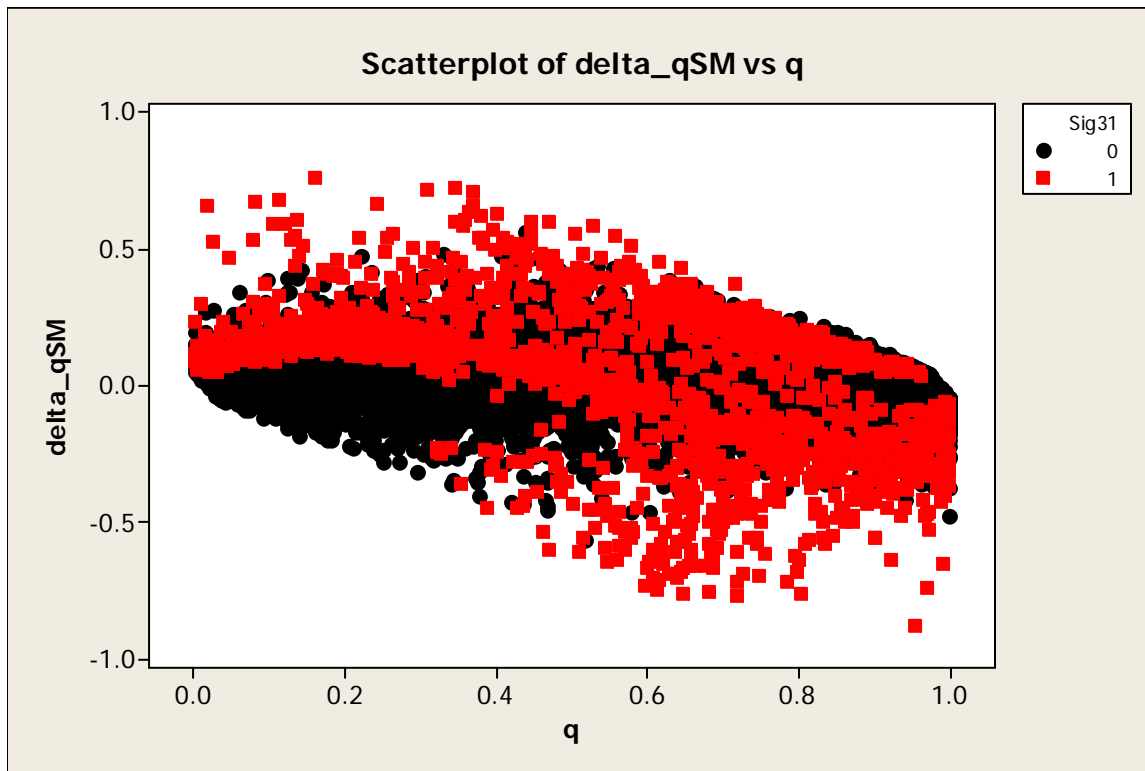

Supplement: NIHMS762340-supplement-Supplemental_Tables.pdf [file NIHMS762340-supplement-Supplemental_Tables.pdf]
